# Supplementary material for: Cooperative intramolecular interaction of diazacrown ether bearing β-diketone fragments on an ionic liquid extraction system
Source: Royal Society of Chemistry journal article supplement (doi:10.1039/b904596c), 2009-01-01
Supplement: b904596c.pdf [file b904596c.pdf]

Electronic supplementary information

**Cooperative intramolecular interaction of diazacrown ether bearing  $\beta$ -diketone  
fragments on an ionic liquid extraction system**

Kojiro Shimojo,<sup>\*a</sup> Hiroyuki Okamura,<sup>a,b</sup> Naoki Hirayama,<sup>b</sup> Shigeo Umetani,<sup>c</sup>  
Hisanori Imura<sup>b</sup> and Hirochika Naganawa<sup>a</sup>

<sup>a</sup> *Division of Environment and Radiation Sciences, Nuclear Science and Engineering  
Directorate, Japan Atomic Energy Agency, Tokai-mura, Ibaraki, 319-1195, Japan*

<sup>b</sup> *Division of Material Chemistry, Graduate School of Natural Science and Technology,  
Kanazawa University, Kakuma-machi, Kanazawa 920-1192, Japan*

<sup>c</sup> *Institute for Chemical Research, Kyoto University, Uji, Kyoto 611-0011, Japan*

\*To whom correspondence should be addressed. E-mail: shimojo.kojiro@jaea.go.jp

## Synthesis of H2βDA18C6

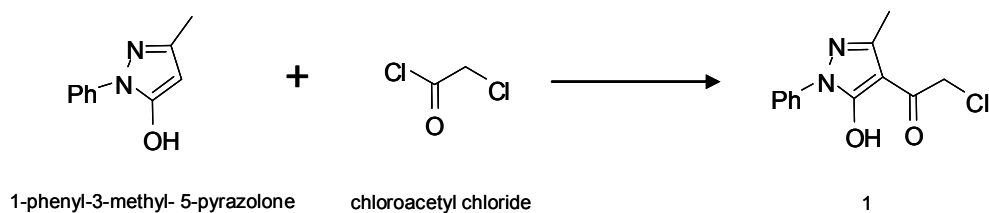

Under a nitrogen atmosphere, 1-phenyl-3-methyl-5-pyrazolone (8.71 g, 0.05 mol) was added to a three-neck flask and was dissolved in 1,4-dioxane (80 mL) by heating to 70 °C. Ca(OH)<sub>2</sub> (7.72 g, 0.1 mol) was added to the solution and subsequently chloroacetyl chloride (11.65 g, 0.1 mol) was delivered by the slow addition of drops of this reagent to the solution. The mixture was heated to reflux at 110 °C for 1 h. After cooling, the resulting brown solution was poured into 2 mol/L HCl (100 mL). The organic materials were extracted with dichloromethane and were washed three-times with fresh 2 mol/L HCl. After the organic layer was dried with anhydrous sodium sulfate, the solvent was removed in vacuo. The crude residue was recrystallized from methanol to obtain chloride **1**.

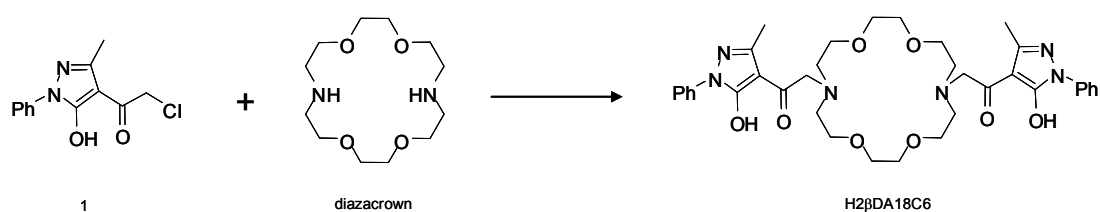

Under a nitrogen atmosphere, a solution of diazacrown (0.52 g, 1.98 mmol), chloride **1** (1.5 g, 5.98 mmol) and triethylamine (0.81g, 8 mmol) in ethanol (10 mL) was refluxed at 92 °C for 1 day. After cooling, the resulting red-wine colored solution was poured into distilled water (50 mL) and extracted with chloroform. The organic layer was washed three-times with distilled water and dried with anhydrous sodium sulfate.

After evaporation of the solvent in vacuo, the crude residue was recrystallized from acetone and methanol to obtain H2 $\beta$ DA18C6; white powder 1.0 g (73.1 %);  $^1\text{H}$  NMR (400 MHz,  $\text{CDCl}_3$ , TMS, 25  $^\circ\text{C}$ )  $\delta$  2.44 (s, 6H, Py- $\text{CH}_3$ ), 3.29 (br m, 8H, N- $\text{CH}_2$ - $\text{CH}_2$ -O), 3.57 (s, 8H, O- $\text{CH}_2$ - $\text{CH}_2$ -O), 3.72 (br m, 8H, N- $\text{CH}_2$ - $\text{CH}_2$ -O), 4.22 (s, 4H, N- $\text{CH}_2$ -C=O), 7.10 (t, 2H, *p*-H of Ph), 7.38 (t, 4H, *m*-H of Ph) and 7.87 ppm (d, 4H, *o*-H of Ph); MS, *m/e* (% relative intensity) 691.6 ( $\text{MH}^+$ , 100). Anal. Calc. for  $\text{C}_{36}\text{H}_{46}\text{O}_8\text{N}_6$ : C, 62.59; H, 6.71; N, 12.17. Found: C, 62.52; H, 6.72; N, 12.24.

### Slope analysis

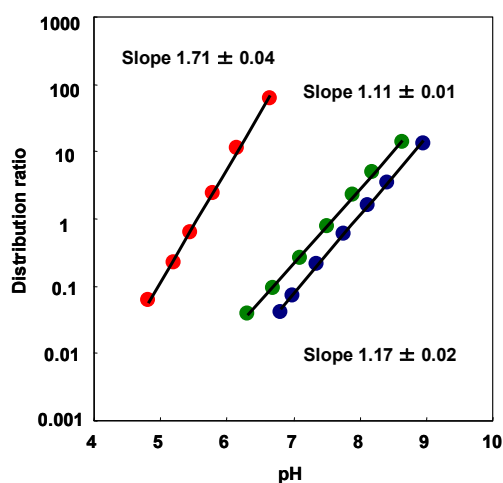

**Fig. S1** Slope analysis of  $\text{Sr}^{2+}$  extraction as a function of the aqueous phase pH in the  $[\text{C}_2\text{mim}][\text{Tf}_2\text{N}]$  system. Aqueous phase:  $[\text{Sr}^{2+}] = 0.01$  mM. Extracting phase:  $[\text{HPMBP}] = 2$  mM,  $[\text{DBzDA18C6}] = 1$  mM and  $[\text{H2}\beta\text{DA18C6}] = 1$  mM. The DBzDA18C6 system (blue symbols), the HPMBP + DBzDA18C6 system (green symbols) and the H2 $\beta$ DA18C6 system (red symbols).
